# Supplementary material for: The PIP Peptide of INFLORESCENCE DEFICIENT IN ABSCISSION Enhances Populus Leaf and Elaeis guineensis Fruit Abscission
Source: MDPI journal article supplement (doi:10.3390/plants8060143), 2019-05-30
Supplement: s1 [file s1]

Figure S1

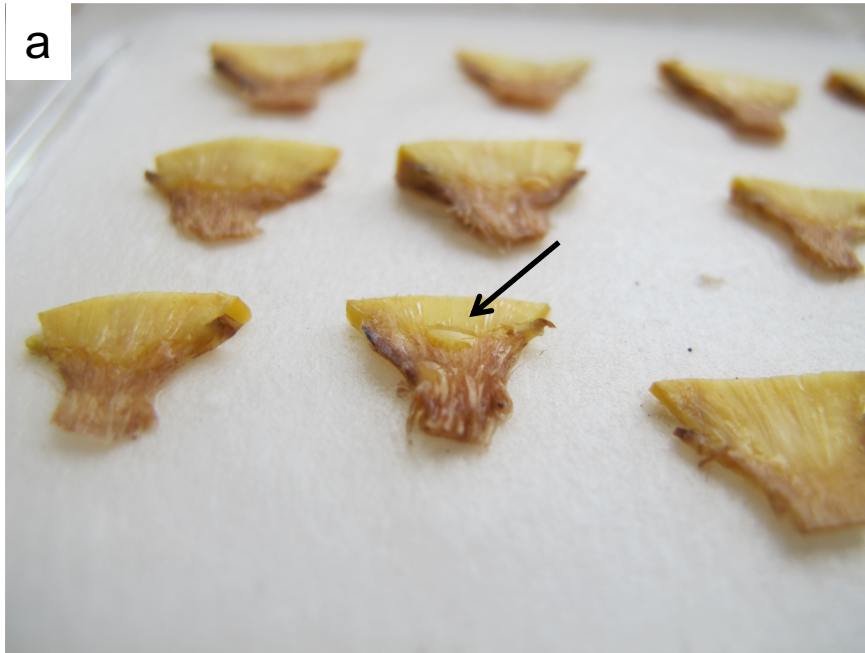

(a) Slices of fruit bases with drop of solution (arrow) with IDA peptide. Slices were incubated for approximately 24 hours at room temperature then phenotyped as described in the Materials and Methods

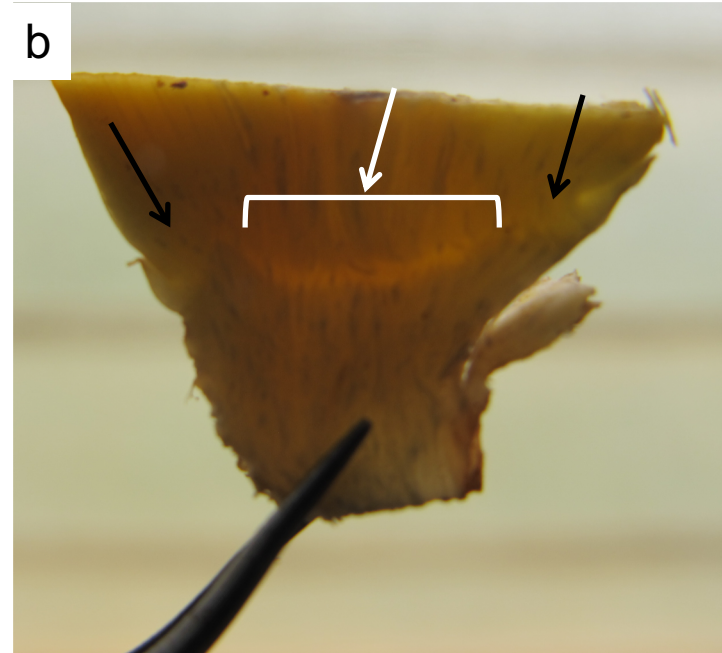

(b) Slice of the base of the oil palm fruit showing the translucent primary AZ (white arrow and bracket) and darker adjacent AZs (black arrows).
